# Supplementary material for: Comparative analysis of mesenchymal stem cells derived from amniotic membrane, umbilical cord, and chorionic plate under serum-free condition
Source: PubMed Central journal article supplement (PMC6330472; doi:10.1186/s13287-018-1104-x), 2019-01-11
Supplement: 13287_2018_1104_MOESM1_ESM.pdf [file 13287_2018_1104_MOESM1_ESM.pdf]

**Table S1** Primers used for real-time PCR

|                | Forward sequence (5'-3') | Reverse sequence (5'-3') |
|----------------|--------------------------|--------------------------|
| <i>PPARG</i>   | ACCAAAGTGCAATCAAAGTGGA   | ATGAGGGAGTTGGAAGGCTCT    |
| <i>LEP</i>     | TGCCTTCCAGAAACGTGATCC    | CTCTGTGGAGTAGCCTGAAGC    |
| <i>ADIPSIN</i> | GACACCATCGACCACGACC      | GCCACGTCGCAGAGAGTTC      |
| <i>OCN</i>     | GCGCTACCTGTATCAATGG      | GTGGTCAGCCAACTCGTCA      |
| <i>RUNX2</i>   | CCGCCTCAGTGATTTAGGGC     | GGGTCTGTAATCTGACTCTGTCC  |
| <i>ON</i>      | TGAGGTATCTGTGGGAGCTAATC  | CCTTGCCGTGTTTGCAGTG      |
| <i>COL2A1</i>  | TGGACGATCAGGCGAAACC      | GCTGCGGATGCTCTCAATCT     |
| <i>COMP</i>    | CGAGTCCGCTGTATCAACACC    | TCCGTGCAAACCTGCTTGT      |
| <i>DCN</i>     | ATGAAGGCCACTATCATCCTCC   | GTCGCGGTCATCAGGAACTT     |
| <i>ACTB</i>    | TGGCACCCAGCACAATGAA      | CTAAGTCATAGTCCGCCTAGAAGA |

Abbreviations: PPARG, peroxisome proliferator activated receptor gamma; LEP, leptin; LPL, lipoprotein lipase; OCN, bone gamma-carboxyglutamate protein; RUNX2, runt-related transcription factor 2; ON, secreted protein acidic and cysteine rich; COL2A1, collagen type II alpha 1 chain; BGN, biglycan; DCN, decorin; ACTB, actin beta.
