# Supplementary material for: Comparative analysis of mesenchymal stem cells derived from amniotic membrane, umbilical cord, and chorionic plate under serum-free condition
Source: PubMed Central journal article supplement (PMC6330472; doi:10.1186/s13287-018-1104-x), 2019-01-11
Supplement: 13287_2018_1104_MOESM2_ESM.pdf [file 13287_2018_1104_MOESM2_ESM.pdf]

**Figure S1** Immunophenotyping Analysis of AM-MSCs, UC-MSCs and CP-MSCs.

| Antibodies (%) | AM-MSCs          | UC-MSCs           | CP-MSCs          |
|----------------|------------------|-------------------|------------------|
| CD73           | 99.54 $\pm$ 0.13 | 99.95 $\pm$ 0.02  | 99.52 $\pm$ 0.14 |
| CD90           | 99.98 $\pm$ 0.02 | 100.00 $\pm$ 0.00 | 99.97 $\pm$ 0.03 |
| CD105          | 99.82 $\pm$ 0.08 | 99.99 $\pm$ 0.01  | 99.35 $\pm$ 0.25 |
| HLA-DR         | 0.08 $\pm$ 0.08  | 0.03 $\pm$ 0.02   | 0.03 $\pm$ 0.03  |
| CD14           | 0.28 $\pm$ 0.06  | 0.04 $\pm$ 0.02   | 0.47 $\pm$ 0.24  |
| CD19           | 0.04 $\pm$ 0.03  | 0.00 $\pm$ 0.00   | 0.05 $\pm$ 0.03  |
| CD34           | 0.34 $\pm$ 0.33  | 0.14 $\pm$ 0.08   | 0.19 $\pm$ 0.10  |
| CD45           | 0.21 $\pm$ 0.10  | 0.12 $\pm$ 0.02   | 0.41 $\pm$ 0.07  |

Immunophenotyping analysis of MSCs derived from three individual donors. All data were presented as the mean  $\pm$  SEM ( $n = 3$ ).
