# Supplementary material for: Comparative analysis of mesenchymal stem cells derived from amniotic membrane, umbilical cord, and chorionic plate under serum-free condition
Source: PubMed Central journal article supplement (PMC6330472; doi:10.1186/s13287-018-1104-x), 2019-01-11
Supplement: 13287_2018_1104_MOESM4_ESM.pdf [file 13287_2018_1104_MOESM4_ESM.pdf]

**Figure S2** Toluidine blue staining results of the CFU test

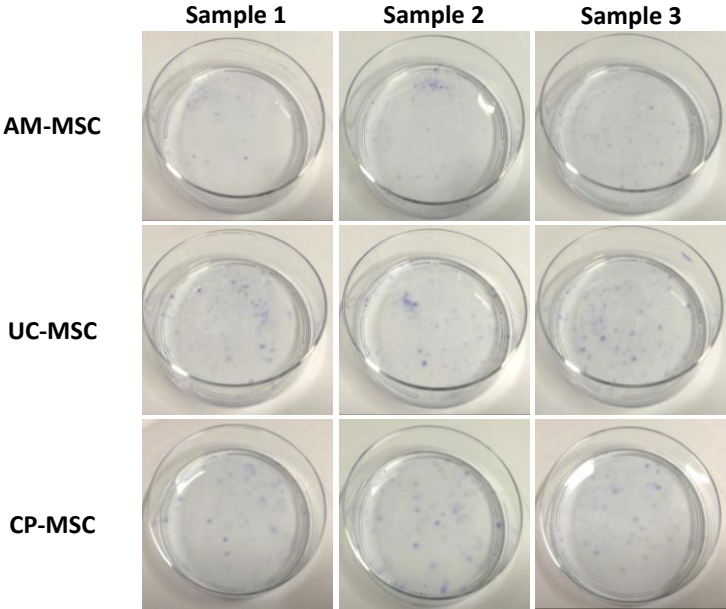

Toluidine blue staining photos of the CFU test. AM-MSC, UC-MSC and CP-MSC samples from three individual donors were tested .
