# Supplementary material for: Comparative analysis of mesenchymal stem cells derived from amniotic membrane, umbilical cord, and chorionic plate under serum-free condition
Source: PubMed Central journal article supplement (PMC6330472; doi:10.1186/s13287-018-1104-x), 2019-01-11
Supplement: 13287_2018_1104_MOESM5_ESM.pdf [file 13287_2018_1104_MOESM5_ESM.pdf]

**Table S3** Gene Ontology (GO) term enriched by genes specifically expressed in CP-MSCs (partly)

| <b>GO term</b>                                          | <b>Count</b> |
|---------------------------------------------------------|--------------|
| GO:0042127 regulation of cell proliferation             | 86           |
| GO:0008284 positive regulation of cell proliferation    | 56           |
| GO:0060548 negative regulation of cell death            | 54           |
| GO:1903047 mitotic cell cycle process                   | 49           |
| GO:0043066 negative regulation of apoptotic process     | 50           |
| GO:0043069 negative regulation of programmed cell death | 50           |
| GO:0006260 DNA replication                              | 26           |
| GO:0022402 cell cycle process                           | 65           |

GO term enriched by CP-MSC specifically expressed genes was partly presented. Through these terms, we could see the positive regulation of cell proliferation together with the negative regulation of cell death in CP-MSCs, which might be an explanation for the higher proliferation ability of CP-MSC.
